# Supplementary material for: Correlations of Anthropometric and Calculation-Modified Anthropometric Measurements with Cardiometabolic Risk Factors in Korean Adults: A National Survey-Based Study
Source: Research Square preprint supplement (doi:10.21203/rs.3.rs-1137638/v1), 2021-12-14
Supplement: Supplementary file 1 [file c4575fab121317c956f313fe.xlsx]

## Sheet: Sheet1
		Unadjusted		Adjusted (smoking,alcohol)		Adjusted (age,gender, smoking,alcohol)
Independent variable	Dependent variable	Beta coefficient (95% CI)	p value	Beta coefficient (95% CI)	p value	Beta coefficient (95% CI)	p value
NC	BMI	1.38 (1.33-1.44)	1.41223e-104	1.38 (1.33-1.44)	2.80341e-104	1.38 (1.33-1.43)	3.48353e-102
NC	WC	3.73 (3.60-3.85)	8.34363e-112	3.73 (3.61-3.86)	1.84048e-111	3.65 (3.53-3.77)	1.20671e-111
NC	Total Chol	-0.57 (-1.51-0.38)	0.243589	-0.57 (-1.52-0.38)	0.245204	-0.36 (-1.29-0.58)	0.453783
NC	HDL	-1.57 (-1.85--1.30)	9.31751e-22	-1.58 (-1.86--1.31)	1.70977e-22	-1.49 (-1.75--1.23)	9.32886e-22
NC	TG	9.61 (7.96-11.26)	1.27812e-22	9.91 (8.27-11.55)	1.11445e-23	9.64 (7.99-11.30)	1.56725e-22
NC	Log TG	0.08 (0.07-0.09)	2.44363e-28	0.08 (0.07-0.09)	1.8936e-28	0.08 (0.07-0.09)	5.57494e-27
NC	LDL	0.87 (-1.80-3.54)	0.525243	0.64 (-2.12-3.41)	0.648978	0.51 (-2.30-3.33)	0.721761
NC	Glucose	3.13 (2.51-3.76)	3.42827e-18	3.19 (2.56-3.82)	2.62534e-18	3.03 (2.38-3.67)	1.52688e-16
NC	HbA1c	0.12 (0.10-0.15)	1.38121e-18	0.12 (0.10-0.15)	4.67205e-18	0.12 (0.09-0.14)	1.63793e-16
NC	Serum Insulin	1.30 (1.12-1.48)	3.07508e-31	1.33 (1.16-1.50)	1.73618e-32	1.30 (1.12-1.48)	5.59729e-30
NC	BUN	0.14 (0.03-0.25)	0.0163865	0.12 (0.01-0.22)	0.0316636	0.04 (-0.06-0.13)	0.474472
NC	Creatinine	0.01 (0.00-0.01)	0.000230243	0.01 (0.00-0.01)	5.20325e-05	0.01 (0.00-0.01)	0.000237979
NC	AST	0.60 (0.30-0.90)	0.000105323	0.66 (0.37-0.95)	1.70617e-05	0.59 (0.28-0.89)	0.000240708
NC	ALT	1.79 (1.44-2.15)	2.0456e-18	1.86 (1.51-2.21)	1.95696e-19	1.84 (1.47-2.20)	2.56835e-18
NC	Hb	0.10 (0.07-0.12)	8.69347e-11	0.10 (0.08-0.13)	4.39852e-13	0.10 (0.08-0.13)	3.46408e-13
NC	Hct	0.27 (0.19-0.35)	1.58305e-10	0.29 (0.22-0.37)	2.03324e-12	0.29 (0.22-0.37)	1.56784e-12
NC	Uric acid	0.13 (0.11-0.15)	1.41374e-21	0.13 (0.11-0.15)	1.5293e-21	0.12 (0.10-0.15)	8.35994e-20
NC	FVC	-0.02 (-0.03--0.01)	0.00778929	-0.02 (-0.03--0.01)	0.00456035	0.00 (-0.01-0.01)	0.71426
NC	FEV1	-0.01 (-0.02-0.00)	0.122562	-0.01 (-0.02-0.00)	0.075399	0.01 (0.00-0.02)	0.172142
NC	FEV1/FVC	0.00 (0.00-0.00)	0.00941031	0.00 (0.00-0.00)	0.0123604	0.00 (0.00-0.00)	6.66184e-05
NC	FEF25_75	0.02 (0.00-0.04)	0.048258	0.02 (0.00-0.04)	0.0653985	0.04 (0.02-0.06)	2.44293e-06
NC/BMI	BMI	-22.45 (-23.10--21.80)	2.90456e-122	-22.45 (-23.10--21.79)	3.22227e-120	-22.45 (-23.12--21.78)	4.74209e-118
NC/BMI	WC	-53.02 (-55.14--50.91)	4.30054e-100	-53.04 (-55.19--50.89)	2.96599e-98	-51.67 (-53.87--49.46)	2.24635e-94
NC/BMI	Total Chol	-5.50 (-17.39-6.40)	0.366295	-5.23 (-17.41-6.96)	0.401762	-9.47 (-21.89-2.96)	0.137416
NC/BMI	HDL	19.31 (15.31-23.32)	3.27223e-17	19.45 (15.51-23.38)	8.90441e-18	17.58 (13.73-21.44)	8.71873e-16
NC/BMI	TG	-96.22 (-121.48--70.96)	4.64409e-12	-103.31 (-125.75--80.87)	5.10299e-16	-98.07 (-121.14--75.00)	3.2908e-14
NC/BMI	Log TG	-0.84 (-1.00--0.68)	1.0764e-19	-0.87 (-1.02--0.72)	9.08747e-22	-0.81 (-0.97--0.65)	7.52202e-19
NC/BMI	LDL	-11.81 (-45.40-21.78)	0.492102	-5.64 (-40.70-29.43)	0.753273	-5.84 (-40.44-28.75)	0.7412
NC/BMI	Glucose	-31.94 (-39.99--23.88)	8.19296e-13	-32.25 (-40.44--24.06)	1.13916e-12	-29.08 (-37.32--20.84)	1.01517e-10
NC/BMI	HbA1c	-1.00 (-1.32--0.69)	2.11771e-09	-1.01 (-1.32--0.69)	4.24513e-09	-0.82 (-1.14--0.51)	8.20852e-07
NC/BMI	Serum Insulin	-16.44 (-18.83--14.05)	2.68888e-28	-16.63 (-19.03--14.23)	1.557e-28	-16.14 (-18.54--13.75)	1.91857e-27
NC/BMI	BUN	-2.32 (-3.89--0.76)	0.00400299	-2.15 (-3.71--0.60)	0.00737942	-0.54 (-1.97-0.88)	0.454942
NC/BMI	Creatinine	-0.03 (-0.08-0.03)	0.313532	-0.02 (-0.07-0.03)	0.473033	0.01 (-0.04-0.06)	0.828495
NC/BMI	AST	-7.21 (-11.44--2.97)	0.00105877	-8.46 (-12.02--4.89)	6.75353e-06	-7.02 (-10.52--3.52)	0.000124106
NC/BMI	ALT	-20.43 (-24.83--16.03)	3.05496e-16	-21.48 (-25.54--17.42)	1.21591e-19	-21.11 (-25.33--16.89)	4.38458e-18
NC/BMI	Hb	-0.99 (-1.36--0.61)	6.32114e-07	-1.04 (-1.41--0.67)	1.48242e-07	-1.02 (-1.39--0.66)	1.48273e-07
NC/BMI	Hct	-2.71 (-3.75--1.67)	8.6032e-07	-2.82 (-3.85--1.78)	3.49886e-07	-2.82 (-3.85--1.79)	2.8768e-07
NC/BMI	Uric acid	-1.45 (-1.76--1.13)	7.0605e-16	-1.44 (-1.76--1.13)	8.10127e-16	-1.34 (-1.66--1.03)	3.53249e-14
NC/BMI	FVC	0.64 (0.45-0.83)	4.52338e-10	0.63 (0.44-0.82)	1.04318e-09	0.37 (0.20-0.53)	2.09237e-05
NC/BMI	FEV1	0.43 (0.27-0.58)	1.63134e-07	0.42 (0.27-0.57)	1.74761e-07	0.17 (0.04-0.30)	0.00886395
NC/BMI	FEV1/FVC	-0.02 (-0.04--0.01)	0.0138142	-0.02 (-0.04-0.00)	0.0185784	-0.04 (-0.06--0.02)	7.71518e-05
NC/BMI	FEF25_75	0.04 (-0.21-0.29)	0.741543	0.05 (-0.19-0.30)	0.662053	-0.30 (-0.53--0.08)	0.00958124
NC/WC	BMI	-74.80 (-78.44--71.16)	5.8458e-87	-75.36 (-79.09--71.63)	3.14992e-85	-80.61 (-84.60--76.63)	5.78233e-85
NC/WC	WC	-257.65 (-264.74--250.56)	2.9382e-125	-258.11 (-265.33--250.88)	5.02247e-123	-259.90 (-267.62--252.19)	1.6675e-118
NC/WC	Total Chol	56.63 (6.34-106.92)	0.028703	51.12 (-0.52-102.77)	0.0540775	1.18 (-54.56-56.93)	0.96687
NC/WC	HDL	102.96 (83.17-122.74)	3.16079e-19	98.81 (79.72-117.90)	4.96452e-19	83.08 (63.37-102.80)	5.07358e-14
NC/WC	TG	-487.48 (-577.05--397.91)	1.64756e-20	-490.47 (-578.52--402.42)	3.79525e-21	-464.09 (-563.73--364.46)	2.76506e-16
NC/WC	Log TG	-4.32 (-5.01--3.64)	4.00045e-25	-4.26 (-4.94--3.59)	3.56584e-25	-3.87 (-4.61--3.12)	3.45103e-19
NC/WC	LDL	32.29 (-141.17-205.75)	0.715858	48.57 (-134.03-231.18)	0.603111	15.60 (-186.32-217.52)	0.879912
NC/WC	Glucose	-168.18 (-202.15--134.21)	7.08631e-18	-166.99 (-202.54--131.44)	1.65306e-16	-138.89 (-176.75--101.04)	2.27832e-11
NC/WC	HbA1c	-6.39 (-7.65--5.13)	1.60623e-18	-6.22 (-7.53--4.91)	1.02451e-16	-4.33 (-5.76--2.91)	1.50388e-08
NC/WC	Serum Insulin	-70.27 (-80.19--60.35)	1.82086e-29	-69.39 (-79.21--59.57)	2.83277e-29	-68.58 (-78.47--58.69)	1.60326e-28
NC/WC	BUN	-23.51 (-29.89--17.13)	1.80891e-11	-21.36 (-27.64--15.08)	3.92898e-10	-1.78 (-8.15-4.59)	0.585177
NC/WC	Creatinine	-0.22 (-0.45-0.00)	0.0563319	-0.14 (-0.36-0.08)	0.213452	0.21 (0.00-0.42)	0.0511449
NC/WC	AST	-38.76 (-53.67--23.86)	9.38216e-07	-40.16 (-55.18--25.14)	4.93139e-07	-24.25 (-39.11--9.40)	0.00165749
NC/WC	ALT	-76.12 (-92.38--59.87)	1.78835e-16	-79.17 (-95.26--63.08)	1.12297e-17	-80.59 (-98.71--62.48)	3.29044e-15
NC/WC	Hb	-4.03 (-5.91--2.16)	4.12386e-05	-4.22 (-6.05--2.40)	1.10532e-05	-4.48 (-6.35--2.61)	5.85216e-06
NC/WC	Hct	-11.16 (-16.19--6.14)	2.36687e-05	-11.66 (-16.57--6.76)	6.50007e-06	-12.85 (-17.89--7.82)	1.47178e-06
NC/WC	Uric acid	-5.73 (-7.15--4.30)	4.78768e-13	-5.68 (-7.11--4.24)	1.08947e-12	-4.71 (-6.26--3.16)	1.68842e-08
NC/WC	FVC	4.36 (3.63-5.08)	2.0933e-23	4.08 (3.36-4.79)	6.24093e-22	0.93 (0.24-1.62)	0.00862288
NC/WC	FEV1	3.75 (3.14-4.36)	2.45175e-24	3.49 (2.91-4.07)	1.97654e-23	0.48 (-0.06-1.02)	0.0836899
NC/WC	FEV1/FVC	0.13 (0.05-0.22)	0.00318824	0.12 (0.03-0.20)	0.0080844	-0.09 (-0.17-0.00)	0.0490655
NC/WC	FEF25_75	4.14 (3.04-5.24)	7.16585e-12	3.77 (2.72-4.83)	6.52257e-11	-0.60 (-1.65-0.45)	0.265794
